# Supplementary material
Source: PubMed Central journal article supplement (PMC6293107)
Supplement: AEM.02414-18-s0001.pdf [file AEM.02414-18-s0001.pdf]

## MATERIALS AND METHODS

### **Amplified fragment length polymorphism (AFLP) analysis**

We used an AFLP Microbial Fingerprinting kit (Life Technologies, Carlsbad, CA, USA) for AFLP analysis, according to manufacturer's instructions. T4 DNA ligase, EcoRI, and MseI (New England Biolabs, Beverly, MA, USA) were used in the simultaneous restriction–ligation reaction. Preselective and selective polymerase chain reactions (PCRs) were performed in an iCycler thermal cycler (Bio-Rad Laboratories Hercules, CA, USA). A fluorescent dye-labelled EcoRI primer with two-base selection (FAM-EcoRI +AC, NED-EcoRI +AT, or JOE-EcoRI +AG) and an unlabelled MseI primer with two-base selection (MseI +CA) were used in the selective PCR. The FAM-EcoRI +AC, NED-EcoRI +AT, or JOE-EcoRI +AG reaction mixture was mixed in a 1:3:1 (v:v:v) ratio after the selective PCR. Hi-Di formamide (9.95  $\mu$ L; Life Technologies) and standard size GeneScan 500 (ROX; 0.05  $\mu$ L; Life Technologies) were added to 1.5  $\mu$ L of each mixed sample. The samples were analysed with the modified conditions of injection, voltage 2.0, and time 44 using a 3100 Genetic Analyser with a 36-cm 16-capillary array, a Performance Optimized Polymer 6 (POP6) separation matrix, and GeneScan collection software (Life Technologies). The obtained

data were processed using GeneMapper software (Life Technologies) to produce the binary matrix for phylogenetic analysis.

### **Phylogenetic analysis**

The binary data for a total of 66 AFLP markers of EACMCAB (FAM-EcoRI +AC), EATMCAY (NED-EcoRI +AT), and EAGMCAG (JOE-EcoRI +AG) from 95 taxa were compiled into a single data matrix. Neighbour-joining (NJ) analysis (Saitou and Nei 1987) of the binary data was performed using PAUP\* (version 4.0 $\beta$ 10) (Swofford 2002). Ties were broken randomly when encountered.

The sequence datasets combined the data for *TEF1 $\alpha$*  and *RPB2* from 35 taxa including an outgroup (*Fusarium hostae* NRRL29889). The sequences obtained in the present study were aligned with MAFFT (version 7) using the E-INS-i option online (Kato et al 2002, Kato et al 2005, Kato et al 2009). The sequences were truncated at the 5' - and 3' -ends, and manually aligned when necessary using ChromasPro. Phylogenetic trees were obtained using maximum parsimony (MP), maximum likelihood (ML), and Bayesian phylogenetic analyses. The best-fit evolutionary model was determined for each dataset by comparing different evolutionary models via the corrected Akaike information criterion (AICc) (Akaike 1974, Sugiura 1978) for MP and ML analyses, and the Bayesian information criterion (BIC) (Schwarz 1978) for the Bayesian analysis.

Kakusan4 (Tanabe 2007) and PAUP\* were used for likelihood calculations. As a result of the calculations, the TEF1 $\alpha$  regions were fitted to a J2 model with a gamma-shaped distributed rate. RPB2 regions were fitted to a TN93ef model with a gamma-shaped distributed rate. The combined dataset of the TEF1 $\alpha$  and the RPB2 regions was fitted to a J2ef model with a gamma-shaped distributed rate. MP analysis with the selected evolutionary model was carried out using PAUP\*. MP analysis was performed for 1,000 replications with different random starting points using the step-wise addition option to increase the likelihood of finding the most parsimonious tree. Alignment gaps were treated as new state data, and all characters were unordered and had equal weight. The branch-swapping algorithm was tree bisection and reconstruction (TBR). Branches of zero length were collapsed and all multiple, equally parsimonious trees were saved. The best tree topology of the MP trees was established using the Kishino–Hasegawa likelihood test (Kishino and Hasegawa 1989) on PAUP\*. We calculated the tree length (TL), consistency index (CI), retention index (RI), homoplasy index (HI), and rescaled consistency index (RC). The ML analysis was performed by the likelihood ratchet method (Vos 2003). For the ML tree search, 1,000 sets of 25% site-upweighted data were created using the pgresampleseq command in Phylogears 1.0.2009.07.17 (Tanabe 2007), and ML trees with upweighted data were estimated using Treefinder (June 2008

release) (Jobb et al 2005) by applying the best-fit model. The strength of the internal branches from the resulting tree was tested by bootstrap (BS) analysis (Felsenstein 1985) using 10,000 replications in NJ, MP, and ML analysis. Bayesian phylogenetic analyses with the selected evolutionary model were carried out using MrBayes (version 3.2.5) (Ronquist and Huelsenbeck 2003). It was launched with random starting trees for  $5 \times 10^6$  generations, and the Markov chains were sampled every 500 generations. To ensure that the Markov chain did not become trapped in local optima, we used the Metropolis-coupled Markov chain Monte Carlo (MCMCMC) algorithm, performing the estimation with four incrementally heated Markov chains. In each of these analyses, the first 461,000 generations were discarded as burn-in. The remaining trees were summarized in a 50% majority-rule consensus tree, yielding the probabilities of each clade being monophyletic.

### **Single nucleotide polymorphism analysis**

Polymerase chain reaction–restriction fragment length polymorphism (PCR-RFLP) experiments for TEF\_C447A, FUM1\_G423A, FUM78\_C41T, FUM8\_G2834A, FUM18\_G51T, and RPB2\_C3250T were performed using the following primers/restriction enzymes: HS434/HS435/NspI, HS482/HS483/NruI,

HS576/HS577/NruI, HS576/HS577/HincII, HS506/HS519/MseI, and HS833/HS834/BmrI, respectively, under the same conditions used for HIS PCR-RFLP (Suga et al 2014) except that the annealing temperature for HS576/HS577 was 58°C, 2% Metaphor agarose gel (Cambrex Bio Science) was used for HS434/HS435/NspI and HS482/HS483/NruI, and 2.5% agarose gel was used for HS833/HS834/BmrI. The derived cleaved amplified polymorphic sequence (dCAPS) primers (HS435, HS482, and HS834) for PCR-RFLP were designed using dCAPS Finder 2.0 (Table S1) (Neff et al 2002). The PCR-sequencing for CPR\_C1152A and P4504\_C842T were performed as PCR and sequencing in MATERIALS AND METHODS in the original paper.

A multiplex PCR was performed to prepare template DNA for allele-specific primer extension (ASPE) reactions. The PCR components for *TEF1 $\alpha$*  and *FUM* amplification comprised 0.025 units of rTaq polymerase (TaKaRa Bio Inc.) in a 10  $\mu$ L reaction mixture containing 1  $\times$  reaction buffer, 200  $\mu$ M dNTPs, 1  $\mu$ M of each HS438 and HS439 primer (Table S1) (Suga et al 2014), 0.5  $\mu$ M of each HS576 and HS577 primer (Table S1), and 5 ng of genomic DNA. The PCR components for CPR and P450-4 amplification comprised 1  $\mu$ M of each P138-5, HS556, HSP450-4-GD1, and P450-4-GD2 primer (Table S1) (Malonek et al 2005). The PCR was performed in an iCycler thermal cycler (Bio-Rad Laboratories) using the following cycling parameters: 94°C for

2 min, 35 cycles of 94°C for 1 min, 58°C for 1 min, and 72°C for 1 min. Each 2.5- $\mu$ L PCR mixture comprising *TEF1 $\alpha$ /FUM* and *CPR/P450-4*, 0.2  $\mu$ L of ExoSAP-IT (GE Healthcare Life Sciences, Uppsala, Sweden), and 1.8  $\mu$ L of water was kept at 37°C for 30 min, then at 80°C for 15 min. The ASPE reactions were performed according to the manufacturer's instructions using Platinum Genotype Tsp DNA Polymerase (Invitrogen Life Technologies, Carlsbad, CA) and HS641, HS642, HS704, HS705, HS700, HS7001, HS557, HS558, HS559, and HS560 primers (Table S1) constituting a volume of 20  $\mu$ L and with a 1-min extension step at 50°C. The biotin-labelled products were sorted by hybridization with polystyrene microspheres coated with the following anti-tag sequences: LUA-12, -65, -87, -97, -67, -76, -16, -28, -2, and -14. The hybridizations were performed in 45- $\mu$ L volumes using 1  $\times$  T<sub>m</sub> hybridization buffer (0.2 M NaCl, 0.1 M Tris, 0.08% Triton X-100) at pH 8.0 with 20  $\mu$ L of the extension product. The samples were incubated for 90 s at 96°C, followed by 30 min at 37°C, and were then transferred to a 96-well filtration plate (MultiScreen HTS; Millipore Corp., Billerica, MA, USA). The liquid was removed using a vacuum manifold, and 100  $\mu$ L of 1  $\times$  T<sub>m</sub> hybridization buffer was added; this procedure was repeated twice, and the liquid was removed again by vacuum manifold. The microspheres were resuspended in 100  $\mu$ L of 1  $\times$  T<sub>m</sub> hybridization buffer containing 2  $\mu$ g/mL streptavidin-R-

phycoerythrin (Invitrogen Life Technologies). The median fluorescence intensity (MFI) of 100 microspheres was measured with a Luminex 100 flow cytometer (Luminex Corporation, Austin, TX, USA) after incubation for 15 min at 37°C. SNP was determined from more than 100 MFI values after subtracting the background MFI value obtained using water instead of the extension product. SNP was determined based on ratios of more than twice the MFI value between the paired microspheres corresponding to SNPs: LUA-12/-65, -87/-97, -67/-76, -16/-28, and -2/-14. The SNPs of the *F. fujikuroi* strains used by Niehaus et al. (2017) were obtained from the BioProject at the NCBI, as described above.

### **Fumonisin analysis**

A mycelial plug was transferred in sterile rice medium. Sterile rice medium was prepared as follows; 5 g of rice grain was soaked with 4 ml water in an Erlenmeyer flask for 3 hr and then autoclaved. After fungal growth for 10 days at 25°C, fumonisins were extracted with 25 mL methanol/water (3:1, v/v) by reciprocal shaking for 30 min. The extract filtered through paper was purified by a strong anion exchange column (Sep-Pak Accell Plus QMA Short Cartridge (360 mg), Waters, Milford, MA, USA). A Visiprep™ SPE Vacuum manifold (Supelco Inc., Bellefonte, PA, USA) was used for

the purification. Five mL of the extract was loaded onto the column that is previously washed by 5 mL of methanol and then 10 mL of methanol/water (3:1, v/v). Then 5 mL methanol/water (3:1, v/v) and 5 mL methanol were successively loaded on the column for washing. The fumonisins were eluted with final 5 mL of a solution methanol/acetic acid (99:1, v/v). The eluent 1.4 mL was transferred into a glass tube and the solvent was evaporated under a nitrogen gas stream at 50 °C. The residue was dissolved in 0.2 mL of acetonitrile/water (1:1, v/v) and subjected to ultra-performance liquid chromatography–tandem mass spectrometry (UPLC-MS/MS) analysis. It was performed using an ACQUITY UPLC™ system coupled to a Xevo QToF mass spectrometer (Waters, Milford, MA, USA). An ACQUITY UPLC consisting of a binary pump, an auto-sampler, and a column heater was used. Chromatographic separation was performed at 40 °C on a AQUITY UPLC BEH C18 column, 100 x 2.1 mm i.d., 1.7 µm particle size (Waters). Eluents were composed of formic acid/water (1:999, v/v) (eluent A), and methanol/acetonitrile (1:1, v/v) (eluent B), respectively. Sample injection was conducted at a volume of 2 µL. Elution was conducted at the flow rate of 0.3 mL/min with a linear gradient. After starting with the initial portion of B at 60 %, it was hold for 0.5 min and then increased linearly to 100 % B within 4.5 min. Thereafter, the portion of B was decreased linearly to 60 % within 0.1 min, and hold for 1.9 min. It was kept at



60 % prior to the next sample injection. Ionization was conducted with an electro-spray ionization (ESI) probe in positive polarity. The operating parameters were optimized under the following conditions: capillary voltage, 1.0 kV (positive mode) ); sample cone voltage, 50 V; extraction cone voltage 4 kV; ion source temperature, 120 °C; desolvation temperature, 400 °C; cone gas flow 50 L/h; desolvation gas flow, 1000 L/h (both gases were nitrogen); and argon gas was used for collision. Conditions of collision energies and multiple reaction monitoring (MRM) transitions were set for each FBs: 30 eV and precursor ion 722/ product ion 705 ( $m/z$ ); FB<sub>1</sub>, 30 eV and 706/689 ( $m/z$ ); FB<sub>2</sub> and FB<sub>3</sub>. Data acquisition was performed for 7 min after injection. Under the above conditions, fumonisins were detected at the retention time of 1.0 min (FB<sub>1</sub>), 1.5 min (FB<sub>3</sub>), and 1.9 min (FB<sub>2</sub>), respectively. The fumonisins FB<sub>1</sub> (Enzo Life Sciences, Lausen, Switzerland), FB<sub>2</sub> (Enzo Life Sciences) and FB<sub>3</sub> (Iris Biotech, Marktredwitz, Germany) were used as standard. Working solutions containing FB<sub>1</sub>, FB<sub>2</sub> and FB<sub>3</sub> at concentrations between 0.05-5.0 mg/L (FB<sub>1</sub>/ FB<sub>2</sub>: 0.1, 0.2, 0.5, 1.0, 2.0, 5.0 mg/L, FB<sub>3</sub>: 0.05, 0.1, 0.2, 0.4, 0.6, 1.0 mg/L, respectively in 6 bottles) were prepared in acetonitrile/water (1:1, v/v), and used for calibration curve. The concentration (X) (FB<sub>1</sub>, FB<sub>2</sub> and FB<sub>3</sub>) and corresponding peak area ratio (Y) were plotted for the 6 bottles of the working solution. The limits of quantification (LOQs) for the fumonisin analysis was

the lowest concentration (FB<sub>1</sub>/ FB<sub>2</sub>: 0.1 mg/L, FB<sub>3</sub>: 0.05 mg/L) on the calibration curves for FB<sub>1</sub>, FB<sub>2</sub>, and FB<sub>3</sub>. The concentration of the analyte was calculated from the corresponding Y value with the linear regression line. In cases in which the concentration of the sample exceeded the range given by the calibration curve, the sample was diluted 10 times and re-analyzed.

### **Gibberellin analysis**

A mycelial plug was transferred in 20 mL of 10% ICI medium (Geissman et al 1966) and grown for 7 days on a reciprocal shaker (123 rpm) at 25°C with 0.02% of the trace elements reported by Correl et al. (1987) instead of 0.2% of the original trace elements. After removing the mycelium using filter paper, the gibberellins in the culture filtrate were analysed by thin-layer chromatography (TLC) or by UPLC-MS/MS. The gibberellins GA<sub>3</sub> (Wako Pure Chemicals Ind., Ltd., Osaka, Japan), GA<sub>1</sub>, GA<sub>4</sub>, and GA<sub>7</sub> (Olchemim Ltd., Olomouc, Czech Republic) were dissolved in 10% ethanol and used as standard solutions, and GA<sub>3</sub> and GA<sub>4/7</sub> were analysed by TLC according to the method described by Linnemannstons et al. (1999). The culture filtrate (10 µL) was applied to a 60F254 TLC silica gel plate (Merck KG, Darmstadt, Germany) and separated using a mobile chloroform/ethyl acetate/acetic acid phase (90:60:5). After air drying, HCl was sprayed to the TLC plate and left for 30 min. The GAs were visualized in UV light (356

nm) after heating at 120°C for 10 min. GA<sub>3</sub>, GA<sub>4</sub>, and the GA<sub>7</sub> mixture (5 µL, 100 mg/L each) were used as standards.

The concentrations of the gibberellins (GA<sub>1</sub>, GA<sub>3</sub>, GA<sub>4</sub>, and GA<sub>7</sub>) were quantified by UPLC-MS/MS analysis with the same equipment as fumonisin analysis. The experimental cultures were repeated in triplicate, and the resulting broths were subjected to UPLC-MS/MS analysis. Chromatographic separation was performed at 40°C on a AQUITY UPLC BEH C18 column (Waters). The eluents comprised water containing 5 mM ammonium acetate (eluent A) and methanol containing 5 mM ammonium acetate (eluent B). Both solvents (water and methanol) were LC/MS or high-performance liquid chromatography (HPLC) grade. The injection samples were 5 µL in volume, and the elution was conducted at a flow rate of 0.3 mL/min with a linear gradient of methanol. Starting with 10% eluent B, the proportion of B was increased linearly to 65% within 11.5 min, further increased to 95% within 1.5 min, and held for 1.5 min at 95%. Thereafter, the proportion of B was decreased to 10% within 0.1 min, and kept at 10% prior to the next sample injection. Ionization was conducted with an electro-spray ionization (ESI) probe with negative polarity. The optimum operating parameters were: capillary voltage, 0.5 kV (negative mode); sample cone voltage, 40 V; extraction cone voltage, 4 kV; ion source temperature, 120°C; desolvation temperature, 400°C; cone gas

flow, 50 L/h; desolvation gas flow, 1000 L/h (both gases were nitrogen); and argon gas was used for collision. The collision energies and multiple reaction monitoring (MRM) transitions were set for each GA: GA<sub>1</sub>, 25 eV and precursor ion 347/product ion 229 (m/z); GA<sub>3</sub>, 30 eV and 345/227 (m/z); GA<sub>4</sub>, 15 eV and 331/257 (m/z); and GA<sub>7</sub>, 30 eV and 329/211 (m/z). The data were acquired for 17 min after injection. Under the conditions described above, the gibberellins were detected at the retention times of 4.6 min (GA<sub>1</sub>/GA<sub>3</sub>), 9.0 min (GA<sub>7</sub>), and 9.3 min (GA<sub>4</sub>). Working solutions containing GA<sub>1</sub>, GA<sub>3</sub>, GA<sub>4</sub>, and GA<sub>7</sub> at concentrations of 0.5–5.0 mg/L (GA<sub>3</sub>/GA<sub>7</sub>: 0.5, 1.0, 2.0, 5.0 mg/L; GA<sub>1</sub>/GA<sub>4</sub>: 0.5, 1.0, 1.5, 2.0 mg/L, in four bottles) were prepared in ethanol/water (1/9, v/v), and used to create a calibration curve. The concentration (X) (GA<sub>1</sub>, GA<sub>3</sub>, GA<sub>4</sub>, and GA<sub>7</sub>) and corresponding peak area ratio (Y) were plotted for the four bottles of the working solution. The limit of quantification (LOQ) for the gibberellin analysis was the lowest concentration (0.5 mg/L) on the calibration curves for GA<sub>1</sub>, GA<sub>3</sub>, GA<sub>4</sub>, and GA<sub>7</sub>. The concentration of the analyte was calculated from the corresponding Y value from the linear regression line. In cases in which the concentration of the sample exceeded the range given by the calibration curve, the sample was diluted 4 and 10 times and re-analyzed..

Table S1 Polymerase chain reaction (PCR) primer list

| Primer sequence (5' - 3') |                                               | Objective          | Reference                    |                                                                                                                                                                         |                      |
|---------------------------|-----------------------------------------------|--------------------|------------------------------|-------------------------------------------------------------------------------------------------------------------------------------------------------------------------|----------------------|
| Forward                   | Reverse                                       |                    |                              |                                                                                                                                                                         |                      |
| P138-5                    | AACCCCTACATTGCCCTATC                          | P138-6             | TCGGCAACCAAGAACAAGAGTG       | PCR and sequence of <i>CPR</i>                                                                                                                                          | Malonek et al 2005   |
| HS438                     | GTGTCAAACATAAATTCGACAATAGGAAG                 | HS439 <sup>a</sup> | ATGATATGTTAGTATGAATAAGTAGAAT | PCR and sequence of <i>TEF</i> and PCR for ASPE of <i>TEF_T618G</i>                                                                                                     | Suga et al 2014      |
| EF-11                     | GTGGGGCATTACCCCGCC                            |                    |                              | Sequence of <i>TEF</i>                                                                                                                                                  | O'Donnell et al 1998 |
| EF-21                     | GAGTGGCGGGGTAAATGCC                           |                    |                              | Sequence of <i>TEF</i>                                                                                                                                                  | O'Donnell et al 1998 |
| HS398                     | TTGGAAGTGGCCTACGAGTGT                         | HS399              | GAAGATGGCATTGATTGCCT         | PCR and sequence of <i>FUM1</i>                                                                                                                                         |                      |
| HS482 <sup>a</sup>        | TATGCAATCTTCGGGCCAAAACCGATTTCGCG              | HS483              | ATGGCAAAGTCATGCCACCGGAGACGC  | PCR-RFLP ( <i>Nru</i> I) of <i>FUM1_G423A</i>                                                                                                                           |                      |
| HS576                     | TTCCATCAGATAGCTGATAA                          | HS577              | GACAGCAGGGTCTTGGAAA          | PCR for Luminex ASPE of <i>FUM78_C41T</i> and <i>FUM8_G2834A</i>                                                                                                        |                      |
| P138-5                    | see above                                     | HS556              | GGTTCATCTCAGCCTTGATA         | PCR for Luminex ASPE of <i>CPR_C1152A</i>                                                                                                                               |                      |
| P450-4-GD1                | TTTCTCGGTCCAGAGCACTGCCGC                      | P450-4-GD2         | CGTGGTCTTCCCTTCCCATCTGGC     | PCR and sequence of <i>P450-4</i> , PCR for Luminex ASPE of <i>P4504_C842T</i>                                                                                          | Malonek et al 2005   |
| HS641                     | TACACTTCTTCTTCTTCTTCTTGTATGAATAAGTAGAATTAC    |                    |                              | Luminex ASPE of <i>TEF_T618G</i> , signal detection with <i>LUA-12</i> (FlexMAPxtag)                                                                                    |                      |
| HS642                     | CTTTTCATCAATAATCTTACCTTTGTATGAATAAGTAGAATTAA  |                    |                              | Luminex ASPE of <i>TEF_T618G</i> , <i>LUA-65</i>                                                                                                                        |                      |
| HS704                     | AAACTAACATCAATACTTACATCATATAACTATATCTTARCATCG |                    |                              | Luminex ASPE of <i>FUM78_C41T</i> , <i>LUA-87</i>                                                                                                                       |                      |
| HS705                     | AATCTCATAATCTACATACACTATTATAACTATATCTTARCATCA |                    |                              | Luminex ASPE of <i>FUM78_C41T</i> , <i>LUA-97</i>                                                                                                                       |                      |
| HS700                     | TCATTTACTCAACAATTACAAATCACAAATCAGGATGTCCCTCGC |                    |                              | Luminex ASPE of <i>FUM8_G2834A</i> , <i>LUA-67</i>                                                                                                                      |                      |
| HS701                     | AATCTAACAAACTCATCTAAATACACAATCAGGATGTCCCTCGT  |                    |                              | Luminex ASPE of <i>FUM8_G2834A</i> , <i>LUA-76</i>                                                                                                                      |                      |
| HS557                     | AATCAATCTTCATTCAAATCATCATCATCGTTGGGAGCAAATGCC |                    |                              | Luminex ASPE of <i>CPR_C1152A</i> , <i>LUA-16</i>                                                                                                                       |                      |
| HS558                     | CTACAAACAACAACATTATCAATCATCGTTGGGAGCAAATGCT   |                    |                              | Luminex ASPE of <i>CPR_C1152A</i> , <i>LUA-28</i>                                                                                                                       |                      |
| HS559                     | CTTTATCAATACATACTACAATCATCCGCGTTGTCCCCCATATC  |                    |                              | Luminex ASPE of <i>P4504_C842T</i> , <i>LUA-2</i>                                                                                                                       |                      |
| HS560                     | CTACTATACATCTTACTATACTTTCCGCGTTGTCCCCCATATT   |                    |                              | Luminex ASPE of <i>P4504_C842T</i> , <i>LUA-14</i>                                                                                                                      |                      |
| 7cf                       | ATGGGYAARCAAGCYATGGG                          | 11ar               | GCRTGGATCTTRTCRTCSACC        | PCR and sequence of <i>RPB2</i>                                                                                                                                         | O'Donnell et al 2010 |
| HS833                     | GTACGAACCACCAAGATTCTCAA                       | HS834 <sup>a</sup> | TGCTAAGAAGACACTCAATCAACTG    | PCR-RFLP ( <i>Bmr</i> I) of <i>RPB2_C3250T</i>                                                                                                                          |                      |
| HS576                     | see above                                     | HS577              | see above                    | PCR and sequence of <i>FUM8</i> including <i>FUM8/FUM7</i> intergenic region, PCR-RFLP ( <i>Hinc</i> II) of <i>FUM8_G2834A</i> or ( <i>Nru</i> I) for <i>FUM78_C41T</i> |                      |
| HS434                     | GAGAAGGTTAGTCACTTCCCTTCGATC                   | HS435 <sup>a</sup> | CCGAGCTCAGCGGCTTCTATGTGCGCA  | PCR-RFLP ( <i>Nsp</i> I) of <i>TEF_C447A</i>                                                                                                                            |                      |
| HS506                     | ATGCGGCCGCGRCCGAAAGAAGCATCCGA                 | HS519              | AGCCAAAGAACTTGGCAGT          | PCR and sequence of <i>FUM18</i> including <i>FUM18/FUM19</i> intergenic region, PCR-RFLP ( <i>Mse</i> I) of <i>FUM18_G51T</i>                                          |                      |

<sup>a</sup>Primers were designed with dCAPS (derived cleaved amplified polymorphic sequence) Finder 2.0 (Neff et al 2002)

Table S2 GenBank accession numbers of translation elongation factor 1 $\alpha$  (*TEF1 $\alpha$* ) and RNA polymerase II second largest-subunit (*RPB2*) used in the present study

| Species                          | Strain     | GenBank accession No. for gene |                                   | Reference                                                                                                                    |
|----------------------------------|------------|--------------------------------|-----------------------------------|------------------------------------------------------------------------------------------------------------------------------|
|                                  |            | <i>TEF</i> <sup>a</sup>        | <i>RPB2</i> <sup>b</sup>          |                                                                                                                              |
| <i>F. verticillioides</i> (MP-A) | NRRL22172  | AF160262                       | EF470122                          |                                                                                                                              |
| <i>F. sacchari</i> (MP-B)        | NRRL13999  | AF160278                       | JX171580                          |                                                                                                                              |
| <i>F. proliferatum</i> (MP-D)    | NRRL22944  | AF160280                       | HM068352                          |                                                                                                                              |
|                                  | MAFF236459 | AB725609                       | LC133068 (obtained in this study) |                                                                                                                              |
| <i>F. subglutinans</i> (MP-E)    | NRRL22016  | AF160289                       | JX171599                          |                                                                                                                              |
| <i>F. thapsinum</i> (MP-F)       | NRRL22045  | AF160270                       | JX171600                          |                                                                                                                              |
| <i>F. nygamai</i> (MP-G)         | NRRL13448  | AF160273                       | EF470114                          |                                                                                                                              |
| <i>F. circinatum</i> (MP-H)      | NRRL25331  | AF160295                       | JX171623                          |                                                                                                                              |
| <i>F. concentricum</i>           | NRRL25181  | AF160282                       | LC133069 (obtained in this study) |                                                                                                                              |
| <i>F. fractiflexum</i>           | NRRL28852  | AF160288                       | LC133070 (obtained in this study) |                                                                                                                              |
| <i>F. globosum</i>               | NRRL26131  | AF160285                       | KF466406                          |                                                                                                                              |
| <i>F. mangiferae</i>             | NRRL25226  | AF160281                       | JX171622                          |                                                                                                                              |
| <i>F. hostae</i>                 | NRRL29889  | AY329034                       | JX171640                          | used as outgroup of phylogenetic analysis of <i>F.fujikuroi</i> species complex based on <i>TEF</i> and <i>RPB2</i> sequence |

<sup>a</sup> *TEF* is translation elongation factor 1 $\alpha$ .

<sup>b</sup> *RPB2* is RNA polymerase II second largest-subunit.



## REFERENCES

- Akaike H.** 1974. A new look at the statistical model identification. *IEEE Trans Autom Control* **19**:716–723.
- Correll JC, Klittich CJR, Leslie JF.** 1987. Nitrate nonutilizing mutant of *Fusarium oxysporum* and their use in vegetative compatibility tests. *Phytopathology* **77**:1640-1646.
- Felsenstein J.** 1985. Confidence limits on phylogenies: an approach using the bootstrap. *Evolution* **39**:783–791.
- Geissman TA, Verbiscar AJ, Phinney BO, Cragg G.** 1966. Studies on the biosynthesis of gibberellins from (–)-kaurenoic acid in cultures of *Gibberella fujikuroi*. *Phytochemistry* **5**:933-947.
- Jobb G, von Haeseler A, Strimmer K.** 2004 TREEFINDER: a powerful graphical analysis environment for molecular phylogenetics. *BMC Evol Biol* **4**:18.
- Katoh K, Asimenos G, Toh H.** 2009. Multiple alignment of DNA sequences with MAFFT, p 39–64. *In* Posada D (ed), *Bioinformatics for DNA sequence analysis*. *Methods in Molecular Biology* **537**. Springer, Humana Press.
- Katoh K, Kuma K, Toh H, Miyata T.** 2005. MAFFT version 5: improvement in accuracy of multiple sequence alignment. *Nucleic Acids Res* **33**:511–518.
- Katoh K, Misawa K, Kuma K, Miyata T.** 2002. MAFFT: a novel method for rapid multiple sequence alignment based on fast Fourier transform. *Nucleic Acids Res* **30**:3059–3066.
- Kishino H, Hasegawa M.** 1989 Evaluation of the maximum likelihood estimate of the evolutionary tree topologies from DNA sequence data, and the branching order in Hominoidea. *J Mol Evol* **29**:170–179.
- Linnemannstöns P, Voß T, Hedden P, Gaskin P, Tudzynski B.** 1999. Deletions in the gibberellin biosynthesis gene cluster of *Gibberella fujikuroi* by restriction enzyme-



mediated integration and conventional transformation-mediated mutagenesis. *Appl Environ Microbiol* **65**:2558–2564.

**Malonek S, Bömke C, Bornberg-Bauer E, Rojas MC, Hedden P, Hopkins P, Tudzynski B.** 2005. Distribution of gibberellin biosynthetic genes and gibberellin production in the *Gibberella fujikuroi* species complex. *Phytochemistry* **66**:1296-1311.

**Neff MM, Turk E, Kalishman M.** 2002. Web-based primer design for single nucleotide polymorphism analysis. *Trends Genet* **18**:613-615.

**Niehaus E-M, Kim H-K, Munsterkotter M, Janevska S, Arndt B, Kalinina SA, Houterman PM, Ahn I-P, Alberti I, Tonti S, Kim D-W, Sieber CMK, Humpf H-U, Yun S-H, Guldener U, Tudzynski B.** 2017. Comparative genomics of geographically distant *Fusarium fujikuroi* isolates revealed two distinct pathotypes correlating with secondary metabolite profiles. *PLoS Pathog* **13**:e1006670.

**O'Donnell K, Cigelnik E, Nirenberg HI.** 1998. Molecular systematics and phylogeography of the *Gibberella fujikuroi* species complex. *Mycologia* **90**:465-493.

**O'Donnell K, Sutton DA, Rinaldi MG, Sarver BAJ, Balajee SA, Schroers H-J, Summerbell RC, Robert VARG, Crous PW, Zhang N, Aoki T, Jung K, Park J, Lee Y-H, Kang S, Park B, Geiser DM.** 2010. Internet-accessible DNA sequence database for identifying fusaria from human and animal infections. *J Clin Microbiol* **48**:3708-3718.

**Ronquist F, Huelsenbeck JP.** 2003. MrBayes 3: Bayesian phylogenetic inference under mixed models. *Bioinformatics* **19**:1572–1574.

**Saitou N, Nei M.** 1987. The neighbor-joining method: a new method for reconstructing phylogenetic trees. *Mol Biol Evol* **4**:406–425.

**Schwarz G.** 1978. Estimating the dimension of a model. *Ann Stat* **6**:461–464.

**Suga H, Kitajima M, Nagumo R, Tsukiboshi T, Uegaki R, Nakajima T, Kushiro M, Nakagawa H, Shimizu M, Kageyama K, Hyakumachi M.** 2014. A single nucleotide polymorphism in the translation elongation factor 1alpha gene correlates

with the ability to produce fumonisin in Japanese *Fusarium fujikuroi*. *Fungal Biol* **118**:402-412.

**Sugiura N.** 1978. Further analysis of the data by Akaike's information criterion and the finite corrections. *Comm Stat Theory Methods* **7**:13–26.

**Swofford DL.** 2002 PAUP\*: phylogenetic analysis using parsimony and other methods, 4.0β10. Sinauer, Sunderland

**Tanabe AS.** 2007. Kakusan: a computer program to automate the selection of a nucleotide substitution model and the configuration of a mixed model on multilocus data. *Mol Ecol Notes* **7**:962–964.

**Vos RA.** 2003 Accelerated likelihood surface exploration: the likelihood ratchet. *Syst Biol* **52**:368–373.
